# Supplementary material
Source: MDPI journal article supplement (https://www.mdpi.com/2813-4966/1/1/2)
Supplement: s1 [file s1 › complications-2228484-supplementary.pdf]

Table 1. PRISMA-S Checklist

| SECTION/TOPIC                          | ITEM # | CHECKLIST ITEM                                                                                                                                                                                                                                                     | Comments                                                                       |
|----------------------------------------|--------|--------------------------------------------------------------------------------------------------------------------------------------------------------------------------------------------------------------------------------------------------------------------|--------------------------------------------------------------------------------|
| <b>INFORMATION SOURCES AND METHODS</b> |        |                                                                                                                                                                                                                                                                    |                                                                                |
| Database name                          | 1      | Name each individual database searched, stating the platform for each.                                                                                                                                                                                             | Pubmed, Scopus, Web of Science                                                 |
| Multi-database searching               | 2      | If databases were searched simultaneously on a single platform, state the name of the platform, listing all of the databases searched.                                                                                                                             | No                                                                             |
| Study registries                       | 3      | List any study registries searched.                                                                                                                                                                                                                                | PROSPERO                                                                       |
| Online resources and browsing          | 4      | Describe any online or print source purposefully searched or browsed (e.g., tables of contents, print conference proceedings, web sites), and how this was done.                                                                                                   | Google Scholar, Pubmed with preliminary search terms "prior abdominal surgery" |
| Citation searching                     | 5      | Indicate whether cited references or citing references were examined, and describe any methods used for locating cited/citing references (e.g., browsing reference lists, using a citation index, setting up email alerts for references citing included studies). | Reference lists of included articles                                           |
| Contacts                               | 6      | Indicate whether additional studies or data were sought by contacting authors, experts, manufacturers, or others.                                                                                                                                                  | No                                                                             |
| Other methods                          | 7      | Describe any additional information sources or search methods used.                                                                                                                                                                                                | Additional references included based on identified papers                      |

| SEARCH STRATEGIES      |   |                                                                                                           |                                                                                                                                                                                                                                                                                                                                                                                                                                                                                                                                                                                                                                                                                                                                                                                                                                                                                                                                                                                                                                                                                                                                                                                                                                                                                                                                                                                                                                                                                                                                                                                                                                                                                                                                                          |
|------------------------|---|-----------------------------------------------------------------------------------------------------------|----------------------------------------------------------------------------------------------------------------------------------------------------------------------------------------------------------------------------------------------------------------------------------------------------------------------------------------------------------------------------------------------------------------------------------------------------------------------------------------------------------------------------------------------------------------------------------------------------------------------------------------------------------------------------------------------------------------------------------------------------------------------------------------------------------------------------------------------------------------------------------------------------------------------------------------------------------------------------------------------------------------------------------------------------------------------------------------------------------------------------------------------------------------------------------------------------------------------------------------------------------------------------------------------------------------------------------------------------------------------------------------------------------------------------------------------------------------------------------------------------------------------------------------------------------------------------------------------------------------------------------------------------------------------------------------------------------------------------------------------------------|
| Full search strategies | 8 | Include the search strategies for each database and information source, copied and pasted exactly as run. | <p>Search: (((previous AND ((abdominal surgery) OR (pelvic surgery))) OR hostile abdomen) AND ((Cystectomy OR prostatectomy OR nephrectomy)) Filters: from 2000/1/1 - 2022/9/15</p> <p>((("previous"[All Fields] AND ("abdom surg"[Journal] OR "abdominal"[All Fields] AND "surgery"[All Fields]) OR "abdominal surgery"[All Fields] OR (("pelvics"[All Fields] OR "pelvis"[MeSH Terms] OR "pelvis"[All Fields] OR "pelvic"[All Fields]) AND ("surgery"[MeSH Subheading] OR "surgery"[All Fields] OR "surgical procedures, operative"[MeSH Terms] OR ("surgical"[All Fields] AND "procedures"[All Fields] AND "operative"[All Fields]) OR "operative surgical procedures"[All Fields] OR "general surgery"[MeSH Terms] OR ("general"[All Fields] AND "surgery"[All Fields]) OR "general surgery"[All Fields] OR "surgery s"[All Fields] OR "surgeries"[All Fields] OR "surgeries"[All Fields]))) OR (("hostile"[All Fields] OR "hostiles"[All Fields] OR "hostility"[MeSH Terms] OR "hostility"[All Fields] OR "hostilities"[All Fields]) AND ("abdomen"[MeSH Terms] OR "abdomen"[All Fields] OR "abdomens"[All Fields] OR "abdominal cavity"[MeSH Terms] OR ("abdominal"[All Fields] AND "cavity"[All Fields]) OR "abdominal cavity"[All Fields]))) AND ("cystectomy"[MeSH Terms] OR "cystectomy"[All Fields] OR "cystectomies"[All Fields] OR ("prostatectomy"[MeSH Terms] OR "prostatectomy"[All Fields] OR "prostatectomies"[All Fields]) OR ("nephrectomy"[MeSH Terms] OR "nephrectomy"[All Fields] OR "nephrectomies"[All Fields]))) AND (2000/1/1:2022/9/1[pdat])</p> <p>Translations</p> <p>abdominal surgery: "Abdom Surg"[Journal: __jid0037504] OR ("abdominal"[All Fields] AND "surgery"[All Fields]) OR "abdominal surgery"[All Fields]</p> |

|  |  |  |                                                                                                                                                                                                                                                                                                                                                                                                                                                                                                                                                                                                                                                                                                                                                                                                                                                                                                                                                                                                                                                                                                                                                                                                                                                                                                                                                                                                                                                                                                                                                                                                                                                                                                                 |
|--|--|--|-----------------------------------------------------------------------------------------------------------------------------------------------------------------------------------------------------------------------------------------------------------------------------------------------------------------------------------------------------------------------------------------------------------------------------------------------------------------------------------------------------------------------------------------------------------------------------------------------------------------------------------------------------------------------------------------------------------------------------------------------------------------------------------------------------------------------------------------------------------------------------------------------------------------------------------------------------------------------------------------------------------------------------------------------------------------------------------------------------------------------------------------------------------------------------------------------------------------------------------------------------------------------------------------------------------------------------------------------------------------------------------------------------------------------------------------------------------------------------------------------------------------------------------------------------------------------------------------------------------------------------------------------------------------------------------------------------------------|
|  |  |  | <p>             pelvic: "pelvics"[All Fields] OR "pelvis"[MeSH Terms] OR<br/>             "pelvis"[All Fields] OR "pelvic"[All Fields]<br/>             surgery: "surgery"[Subheading] OR "surgery"[All Fields]<br/>             OR "surgical procedures, operative"[MeSH Terms] OR<br/>             ("surgical"[All Fields] AND "procedures"[All Fields] AND<br/>             "operative"[All Fields]) OR "operative surgical<br/>             procedures"[All Fields] OR "general surgery"[MeSH<br/>             Terms] OR ("general"[All Fields] AND "surgery"[All Fields])<br/>             OR "general surgery"[All Fields] OR "surgery's"[All Fields]<br/>             OR "surgerys"[All Fields] OR "surgeries"[All Fields]<br/>             hostile: "hostile"[All Fields] OR "hostiles"[All Fields] OR<br/>             "hostility"[MeSH Terms] OR "hostility"[All Fields] OR<br/>             "hostilities"[All Fields]<br/>             abdomen: "abdomen"[MeSH Terms] OR "abdomen"[All<br/>             Fields] OR "abdomens"[All Fields] OR "abdomen's"[All<br/>             Fields] OR "abdominal cavity"[MeSH Terms] OR<br/>             ("abdominal"[All Fields] AND "cavity"[All Fields]) OR<br/>             "abdominal cavity"[All Fields]<br/>             Cystectomy: "cystectomy"[MeSH Terms] OR<br/>             "cystectomy"[All Fields] OR "cystectomies"[All Fields]<br/>             prostatectomy: "prostatectomy"[MeSH Terms] OR<br/>             "prostatectomy"[All Fields] OR "prostatectomies"[All<br/>             Fields]<br/>             nephrectomy: "nephrectomy"[MeSH Terms] OR<br/>             "nephrectomy"[All Fields] OR "nephrectomies"[All Fields]           </p> |
|--|--|--|-----------------------------------------------------------------------------------------------------------------------------------------------------------------------------------------------------------------------------------------------------------------------------------------------------------------------------------------------------------------------------------------------------------------------------------------------------------------------------------------------------------------------------------------------------------------------------------------------------------------------------------------------------------------------------------------------------------------------------------------------------------------------------------------------------------------------------------------------------------------------------------------------------------------------------------------------------------------------------------------------------------------------------------------------------------------------------------------------------------------------------------------------------------------------------------------------------------------------------------------------------------------------------------------------------------------------------------------------------------------------------------------------------------------------------------------------------------------------------------------------------------------------------------------------------------------------------------------------------------------------------------------------------------------------------------------------------------------|

|                         |    |                                                                                                                                                                                           |                                       |
|-------------------------|----|-------------------------------------------------------------------------------------------------------------------------------------------------------------------------------------------|---------------------------------------|
| Limits and restrictions | 9  | Specify that no limits were used, or describe any limits or restrictions applied to a search (e.g., date or time period, language, study design) and provide justification for their use. | January 1, 2000-September 15, 2022    |
| Search filters          | 10 | Indicate whether published search filters were used (as originally designed or modified), and if so, cite the filter(s) used.                                                             | No                                    |
| Prior work              | 11 | Indicate when search strategies from other literature reviews were adapted or reused for a substantive part or all of the search, citing the previous review(s).                          | No                                    |
| Updates                 | 12 | Report the methods used to update the search(es) (e.g., rerunning searches, email alerts).                                                                                                | N/A                                   |
| Dates of searches       | 13 | For each search strategy, provide the date when the last search occurred.                                                                                                                 | September 1, 2022                     |
| <b>PEER REVIEW</b>      |    |                                                                                                                                                                                           |                                       |
| Peer review             | 14 | Describe any search peer review process.                                                                                                                                                  | Strategy peer review by senior author |
| <b>MANAGING RECORDS</b> |    |                                                                                                                                                                                           |                                       |
| Total records           | 15 | Document the total number of records identified from each database and other information sources.                                                                                         | Upcoming                              |
| Deduplication           | 16 | Describe the processes and any software used to deduplicate records from multiple database searches and other information sources.                                                        | Upcoming                              |
